# Supplementary material for: Association between PM10 exposure and risk of myocardial infarction in adults: a systematic review and meta-analysis
Source: bioRxiv or medRxiv preprint supplement (doi:10.1101/2023.07.21.23292792), 2023-09-04
Supplement: Supplementary file [file media-1.pdf]

| # | Search Terms            | OVID Medline | Embase     | CINAHL    | Web of Science |
|---|-------------------------|--------------|------------|-----------|----------------|
| 1 | "Air pollution"         | 71,529       | 102,169    | 12,364    | N/A            |
| 2 | "Particulate matter"    | 39,216       | 72,632     | 5,438     | N/A            |
| 3 | "PM10"                  | 8,899        | 14,177     | 1,009     | N/A            |
| 4 | 1 or 2 or 3             | 92,580       | 147,058    | 14,492    | 214,878        |
| 5 | "Myocardial infarction" | 277,001      | 477,620    | 71,936    | N/A            |
| 6 | "Heart attack"          | 194,326      | 432,356    | 73,945    | N/A            |
| 7 | 5 or 6                  | 279,848      | 479,862    | 73,945    | 335,893        |
| 8 | "Adult"                 | 8,383,747    | 10,724,393 | 2,210,812 | 1,902,365      |
| 9 | 4 and 7 and 8           | 286          | 533        | 125       | 155            |
