# Supplementary material for: Association between PM10 exposure and risk of myocardial infarction in adults: a systematic review and meta-analysis
Source: bioRxiv or medRxiv preprint supplement (doi:10.1101/2023.07.21.23292792), 2023-09-04
Supplement: Supplementary file [file media-3.pdf]

| #  | Author/publication year | Study Design   | Country        | Sample size (n) | # Male (%)    | Risk Measure | Exposure Increment                 | Lag Intervals                                                         |
|----|-------------------------|----------------|----------------|-----------------|---------------|--------------|------------------------------------|-----------------------------------------------------------------------|
| 1  | Akbarzadeh 2018 [37]    | Case-crossover | Iran           | 208             | 182 (88.3)    | RR           | 3.61µg/m <sup>3</sup>              | Lag 0: 24hrs post-exposure<br>Lag 1: Average of 3 weeks post-exposure |
| 2  | Atkinson 2013 [38]      | Cohort         | United Kingdom | 13,956          | 8,471 (60.7)  | HR           | IQR change: 3µg/m <sup>3</sup>     | Lag 1: 5-year delay                                                   |
| 3  | Cheng 2009 [39]         | Case-crossover | Taiwan         | 9,349           | NR            | OR           | IQR change: 61.94µg/m <sup>3</sup> | Lag 0-2: Average of same day and previous 2 days                      |
| 4  | Cramer 2020 [40]        | Time-series    | Denmark        | 22,882          | 0 (0)         | HR           | IQR change: 5.5µg/m <sup>3</sup>   | Lag 1: 1-year mean<br>Lag 2: 3-year mean                              |
| 5  | Kim 2017 [41]           | Cohort         | South Korea    | 136,094         | 66,851 (49.1) | HR           | 1µg/m <sup>3</sup>                 | Lag 1: 7-year delay                                                   |
| 6  | Kuzma 2020 [42]         | Case-crossover | Poland         | 1,790           | 1,172 (65.5)  | OR           | IQR change: 15.1µg/m <sup>3</sup>  | Lag 0: NR<br>Lag 1: NR                                                |
| 7  | Lee 2017 [43]           | Cohort         | South Korea    | 37,880          | 26,787 (70.7) | HR           | By Quintile: varying increments    | Lag 0: 24hrs post-exposure                                            |
| 8  | Liu 2020 [44]           | Case-crossover | Canada         | 6,142           | 4,482 (73.0)  | OR           | IQR change: 16µg/m <sup>3</sup>    | Single-day lags: Lag 0, 1, 2<br>Multiple-day lags: Lag 0–3, 0–5       |
| 9  | Pan 2019 [45]           | Case-crossover | Taiwan         | 898             | 745 (83.0)    | OR           | IQR change: 50µg/m <sup>3</sup>    | Single-day lags: Lag 0, 1, 2, 3                                       |
| 10 | Rasche 2018 [46]        | Case-crossover | Germany        | 693             | 466 (67.2)    | OR           | 10 ug/m <sup>3</sup>               | Single-day lags: Lag 1, 2, 3                                          |
| 11 | Rodins 2020 [47]        | Cohort         | Germany        | 4,105           | 1,950 (47.5)  | HR           | 1 ug/m <sup>3</sup>                | Lag 1: 14-year delay                                                  |
| 12 | Sahlen 2019 [48]        | Case-crossover | Sweden         | 14,601          | NR            | OR           | IQR change: 26.5µg/m <sup>3</sup>  | Lag 1-24: Hourly delays per lag                                       |

|    |                    |                |         |        |               |    |                                   |                                                                                                 |
|----|--------------------|----------------|---------|--------|---------------|----|-----------------------------------|-------------------------------------------------------------------------------------------------|
| 13 | Sen 2016 [49]      | Case-crossover | Turkey  | 402    | 310 (77.1)    | RR | 5 ug/m <sup>3</sup>               | Single-day lags: Lag 0, 1, 2, 7                                                                 |
| 14 | Wang 2016 [50]     | Case-crossover | China   | 972    | 515 (53.0)    | OR | 50 ug/m <sup>3</sup>              | Lag 0: Same day                                                                                 |
| 15 | Wichmann 2013 [51] | Case-crossover | Sweden  | 28,215 | 16,627 (58.9) | OR | IQR change: 10.4µg/m <sup>3</sup> | Lag 0: Same day<br>Lag 1: 1-day delay<br>Lag 0-1: Average of same day and 1 day previous        |
| 16 | Wichmann 2014 [52] | Case-crossover | Sweden  | 28,215 | 16,627 (58.9) | OR | IQR change: 10.4µg/m <sup>3</sup> | Lag 0: Same day<br>Lag 1: 1-day delay<br>Lag 0-1: Average of same day and 1 day previous        |
| 17 | Wolf 2015 [53]     | Cohort         | Germany | 15,417 | 11,378 (73.8) | RR | 24.3 ug/m <sup>3</sup>            | Lag 0: Same day<br>Lag 1: 1-day delay<br>Lag 0-5: Average of same day and previous 5 days       |
| 18 | Yu 2018 [54]       | Case-crossover | China   | 5,545  | 3,492 (63.0)  | RR | 10 ug/m <sup>3</sup>              | Single-day lags: Lag 0, 1, 2, 3, 4, 5, 6<br>Multiple-day lags: Lag 0-1, 0-2, 0-3, 0-4, 0-5, 0-6 |
