# Supplementary material for: Association between PM10 exposure and risk of myocardial infarction in adults: a systematic review and meta-analysis
Source: bioRxiv or medRxiv preprint supplement (doi:10.1101/2023.07.21.23292792), 2023-09-04
Supplement: Supplementary file [file media-4.pdf]

| ID#  | Study            | Q1 | Q2 | Q3 | Q4 | Q5 | Q6 | Q7 | Q8 | Q9 | Q10 | Q11 | Q12 | Q13 | Q14 | Score |
|------|------------------|----|----|----|----|----|----|----|----|----|-----|-----|-----|-----|-----|-------|
| #226 | Akbarzadeh 2018  | O  | O  | O  | O  | O  | O  | O  | O  | O  | O   | O   | NA  | O   | O   | Good  |
| #298 | Argacha 2016     | O  | O  | O  | O  | O  | O  | O  | O  | O  | O   | O   | NA  | O   | O   | Good  |
| #379 | Atkinson 2013    | O  | O  | O  | O  | O  | O  | O  | O  | O  | O   | O   | NA  | O   | O   | Good  |
| #355 | Bard 2014        | O  | O  | O  | O  | O  | O  | O  | O  | O  | O   | O   | NA  | O   | O   | Good  |
| #415 | Bhaskaran 2011   | O  | O  | O  | O  | O  | O  | O  | O  | O  | O   | O   | NA  | O   | O   | Good  |
| #129 | Buszman 2020     | O  | O  | O  | O  | O  | O  | O  | O  | O  | O   | O   | NA  | O   | –   | Fair  |
| #89  | Cheng 2021       | O  | O  | O  | O  | O  | O  | O  | O  | O  | O   | O   | NA  | O   | O   | Good  |
| #453 | Cheng 2009       | O  | O  | O  | O  | O  | O  | O  | O  | O  | O   | O   | NA  | O   | O   | Good  |
| #44  | Claeys 2015      | O  | O  | O  | O  | O  | O  | O  | O  | O  | O   | O   | NA  | O   | –   | Fair  |
| #288 | Collart 2017     | O  | O  | O  | O  | O  | O  | O  | O  | O  | O   | O   | NA  | O   | O   | Good  |
| #140 | Cramer 2020      | O  | O  | O  | O  | O  | O  | O  | O  | O  | O   | O   | NA  | O   | O   | Good  |
| #193 | Davoodabadi 2019 | O  | O  | O  | O  | O  | O  | O  | O  | O  | O   | O   | NA  | O   | O   | Good  |
| #237 | Downward 2018    | O  | O  | O  | O  | O  | O  | O  | O  | O  | O   | O   | NA  | O   | O   | Good  |
| #450 | Huss 2010        | O  | O  | O  | O  | O  | O  | O  | O  | O  | O   | O   | NA  | O   | O   | Good  |
| #263 | Kim 2017         | O  | O  | O  | O  | O  | O  | O  | O  | O  | O   | O   | NA  | O   | O   | Good  |
| #130 | Kim 2020         | O  | O  | O  | O  | O  | O  | O  | O  | O  | O   | O   | NA  | O   | O   | Good  |
| #753 | Konduracka 2019  | O  | O  | O  | O  | O  | O  | O  | O  | O  | O   | O   | NA  | O   | O   | Good  |
| #133 | Kuzma 2020       | O  | O  | O  | O  | O  | O  | O  | O  | O  | O   | O   | NA  | O   | –   | Fair  |
| #105 | Kuzma 2021       | O  | O  | O  | O  | O  | O  | O  | O  | O  | O   | O   | NA  | O   | O   | Good  |
| #265 | Lee 2017         | O  | O  | O  | O  | O  | O  | O  | O  | O  | O   | O   | NA  | O   | O   | Good  |
| #424 | Lipsett 2011     | O  | O  | O  | O  | O  | O  | O  | O  | O  | O   | O   | NA  | O   | O   | Good  |
| #64  | Liu 2020         | O  | O  | O  | O  | O  | O  | O  | O  | O  | O   | O   | NA  | O   | O   | Good  |
| #428 | Nuvolone 2011    | O  | O  | O  | O  | O  | O  | O  | O  | O  | O   | O   | NA  | O   | O   | Good  |
| #195 | Pan 2019         | O  | O  | O  | O  | O  | O  | O  | O  | O  | O   | O   | NA  | O   | O   | Good  |
| #462 | Puett 2008       | O  | O  | O  | O  | O  | O  | O  | O  | O  | O   | O   | NA  | O   | O   | Good  |
| #236 | Rasche 2018      | O  | O  | O  | O  | O  | O  | O  | O  | O  | O   | O   | NA  | O   | O   | Good  |
| #137 | Rodins 2020      | O  | O  | O  | O  | O  | O  | O  | O  | O  | O   | O   | NA  | O   | O   | Good  |
| #201 | Roye 2019        | O  | O  | O  | O  | O  | O  | O  | O  | O  | O   | O   | NA  | O   | O   | Good  |
| #758 | Sahlen 2019      | O  | O  | O  | O  | O  | O  | O  | O  | O  | O   | O   | NA  | O   | O   | Good  |
| #318 | Sen 2016         | O  | O  | O  | O  | O  | O  | O  | O  | O  | O   | O   | NA  | O   | O   | Good  |
| #183 | Soleimani 2019   | O  | O  | O  | O  | O  | O  | O  | O  | O  | O   | O   | NA  | O   | O   | Good  |

|             |               |   |   |   |   |   |   |   |   |   |   |   |    |   |   |      |
|-------------|---------------|---|---|---|---|---|---|---|---|---|---|---|----|---|---|------|
| <b>#262</b> | Vidale 2017   | O | O | O | O | O | O | O | O | O | O | O | NA | O | O | Good |
| <b>#312</b> | Wang 2016     | O | O | O | O | O | O | O | O | O | O | O | NA | O | O | Good |
| <b>#380</b> | Wichmann 2013 | O | O | O | O | O | O | O | O | O | O | O | NA | O | O | Good |
| <b>#367</b> | Wichmann 2014 | O | O | O | O | O | O | O | O | O | O | O | NA | O | O | Good |
| <b>#347</b> | Wolf 2015     | O | O | O | O | O | O | O | O | O | O | O | NA | O | O | Good |
| <b>#564</b> | Yang 2022     | O | O | O | O | O | O | O | O | O | O | O | NA | O | O | Good |
| <b>#9</b>   | Yen 2022      | O | O | O | O | O | O | O | O | O | O | O | NA | O | O | Good |
| <b>#252</b> | Yu 2018       | O | O | O | O | O | O | O | O | O | O | O | NA | O | O | Good |
| <b>#323</b> | Zhang 2016    | O | O | O | O | O | O | O | O | O | O | O | NA | O | O | Good |
| <b>#759</b> | Zhu 2019      | O | O | O | O | O | O | O | O | O | O | O | NA | O | O | Good |

O = Criteria satisfied; – = Criteria unsatisfied; NA = Not applicable
