# Supplementary material for: Association between PM10 exposure and risk of myocardial infarction in adults: a systematic review and meta-analysis
Source: bioRxiv or medRxiv preprint supplement (doi:10.1101/2023.07.21.23292792), 2023-09-04
Supplement: Supplementary file [file media-7.pdf]

| <b>GRADE Criteria</b> | <b>RoB</b>       | <b>Inconsistency</b> | <b>Indirectness</b>  | <b>Imprecision</b>                                                   | <b>Publication Bias</b> | <b>Large magnitude of effect</b> | <b>Dose-response gradient</b> | <b>Residual Confounding</b> | <b><u>Quality</u></b> |
|-----------------------|------------------|----------------------|----------------------|----------------------------------------------------------------------|-------------------------|----------------------------------|-------------------------------|-----------------------------|-----------------------|
| <b>Result</b>         | O                | O                    | O                    | O                                                                    | O                       | O                                | O                             | O                           | High                  |
| <b>Reason</b>         | 3 Good<br>1 Fair | $I^2 = 60\%$         | Already screened for | 1.01 (1.00, 1.03)<br><br>CI limits do not cross the 25th percentile. | <5 studies              | NA                               | NA                            | NA                          |                       |
