# Supplementary material for: Association between PM10 exposure and risk of myocardial infarction in adults: a systematic review and meta-analysis
Source: bioRxiv or medRxiv preprint supplement (doi:10.1101/2023.07.21.23292792), 2023-09-04
Supplement: Supplementary file [file media-11.pdf]

| <b>GRADE Criteria</b> | <b>RoB</b>       | <b>Inconsistency</b> | <b>Indirectness</b>  | <b>Imprecision</b>                                                   | <b>Publication Bias</b> | <b>Large magnitude of effect</b> | <b>Dose-response gradient</b> | <b>Residual Confounding</b> | <b><u>Quality</u></b> |
|-----------------------|------------------|----------------------|----------------------|----------------------------------------------------------------------|-------------------------|----------------------------------|-------------------------------|-----------------------------|-----------------------|
| <b>Result</b>         | NA               | NA                   | NA                   | NA                                                                   | NA                      | NA                               | NA                            | NA                          | NA                    |
| <b>Reason</b>         | 1 Good<br>0 Fair | 1 study              | Already screened for | 1.00 (1.00, 1.01)<br><br>CI limits do not cross the 25th percentile. | <5 studies              | NA                               | NA                            | NA                          |                       |
